# Supplementary material
Source: Springer Nature journal article supplement (https://www.springermedizin.de/resource/supplementary/12885_2010_2490_MOESM3_ESM.pdf/9461434)
Supplement: MOESM3 [file 9461434]

| Stromal Genes | Cell Cycle Genes | Individual | Reference Genes |
|---------------|------------------|------------|-----------------|
| BGN           | MKI67            | GADD45B    | ATP5E           |
| FAP           | MYC              |            | GPX1            |
| INHBA         | MYBL2            |            | PGK1            |
|               |                  |            | VDAC2           |
|               |                  |            | UBB             |

$$\begin{aligned}
 RS_u = & \quad 0.1263 \times \text{Stromal Group Score} \\
 & - 0.3158 \times \text{Cell Cycle Group Score} \\
 & + 0.3406 \times \text{GADD45B}
 \end{aligned}$$

where:

$$\text{Stromal Group Score} = (BGN + FAP + INHBA)/3$$

$$\text{Cell Cycle Group Score} = (MYBL2 + Ki-67 + MYC)/3$$

The  $RS_u$  (recurrence score unscaled) is then rescaled to be between 0 and 100:

$$RS = \begin{cases} 0 & \text{if } 44.16 \times (RS_u + 0.30) < 0 \\ 44.16 \times (RS_u + 0.30) & \text{if } 0 \leq 44.16 \times (RS_u + 0.30) \leq 100 \\ 100 & \text{if } 44.16 \times (RS_u + 0.30) > 100 \end{cases}$$
